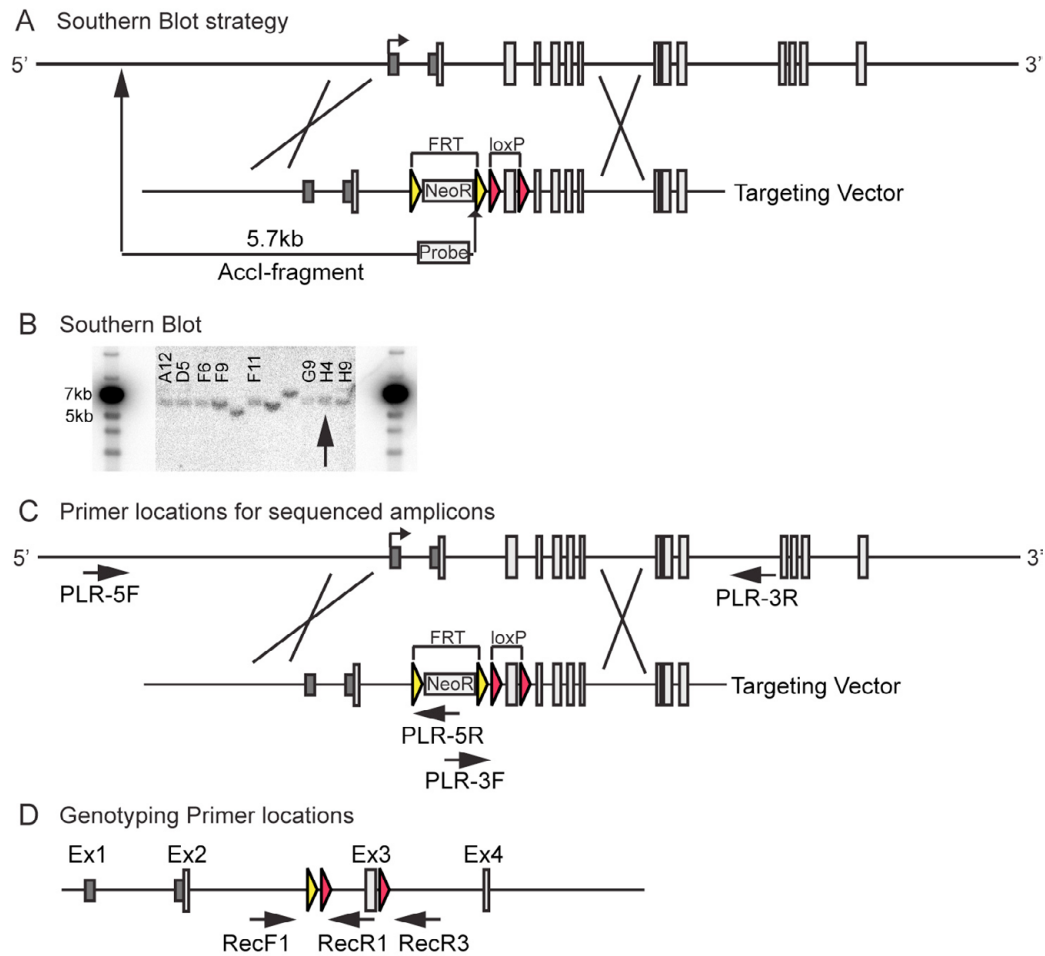

**Fig. S1. Genetic manipulation of the *Porcn* locus.** (A) Schematic of Southern blot strategy depicting the *Porcn* locus and targeting vector. A probe detecting the Neo<sup>R</sup> cassette was used to detect genomic *AccI* fragments of the correct size (5.7 kb). (B) Southern blot of candidate clones. Labeled clones display the correct fragment size. A subclone of cell line H4 (arrow) was used for the generation of animals. (C) Clones were further analyzed by locus-specific long-range PCR with complete sequencing of amplicons. Primer locations for long-range PCR are indicated. (D) Location of genotyping primers in the *Porcn* locus.

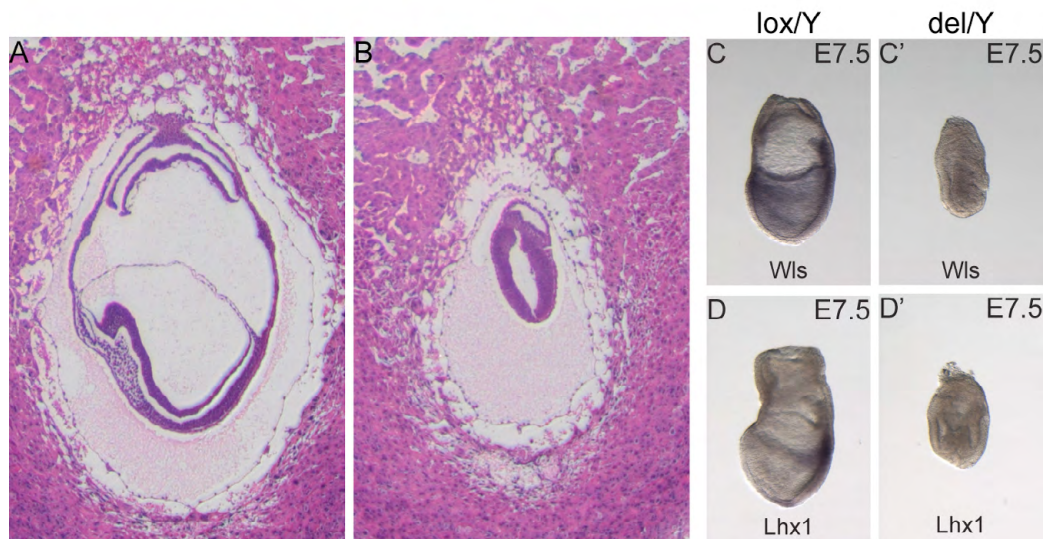

**Fig. S2. *Porcn* zygotic hemizygous phenotype.** (A,B) Sections of E7.5 decidua showing the reduction in size and absence of amnion and chorion in *Porcn*<sup>del/Y</sup> embryos (B) compared with control littermates (A). (C-D') Representative images of *in situ* hybridization at E7.5. *Porcn* mutant embryos fail to express the canonical Wnt signaling target *Wls* (C') and the migrating mesoderm marker *Lhx1* (D').

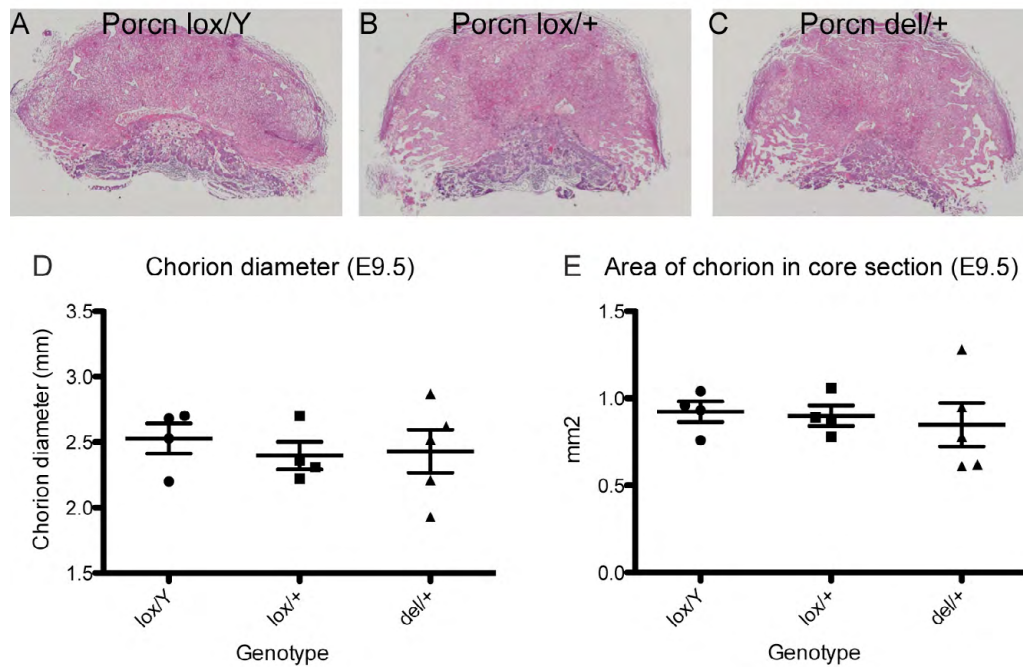

**Fig. S3. *Porcn* zygotic heterozygous phenotype.** (A-C) Representative images of H&E-stained placental core sections at E9.5 of *Porcn*<sup>lox/Y</sup>, *Porcn*<sup>lox/+</sup> and *Porcn*<sup>del/+</sup>. (D,E) Quantification of the width (D) and area (E) of the chorionic disc in core sections revealed no statistically significant differences (Student's *t*-test).

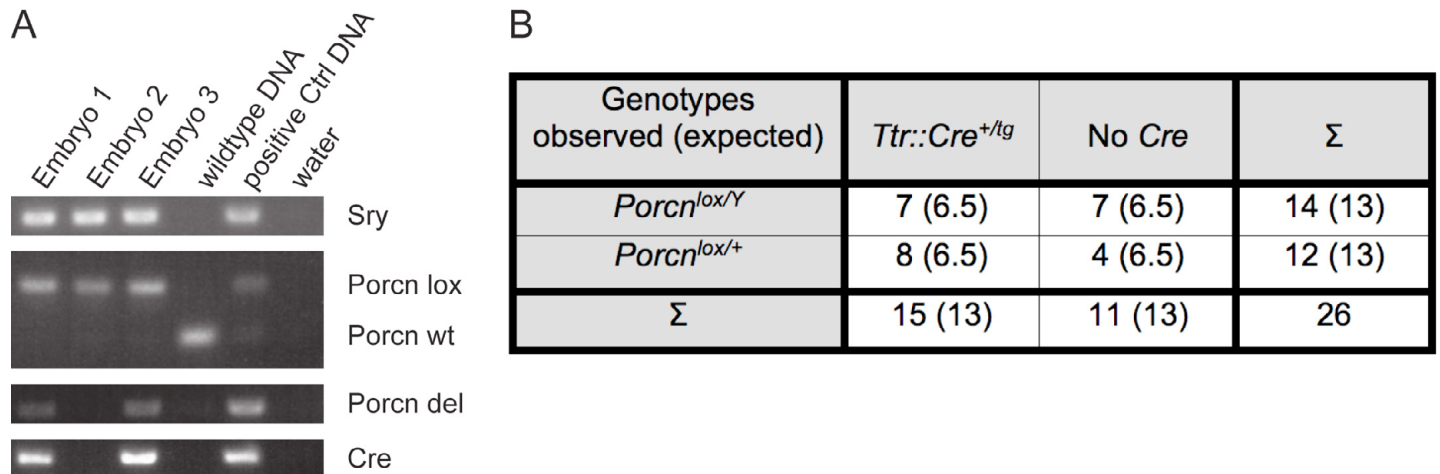

**Fig. S4. Visceral endoderm-specific deletion of *Porcn*.** *Porcn*<sup>lox/lox</sup> females were crossed to *Ttr::Cre*<sup>tg/+</sup> males to generate embryos with VE-specific *Porcn* deletion. (A) PCR analysis shows Cre-mediated deletion in E7.5 embryos carrying Cre recombinase (embryos 1 and 3). *Sry*-specific primers were used to determine the sex of embryos. (B) All possible genotypes were observed at the expected Mendelian ratios at weaning age.

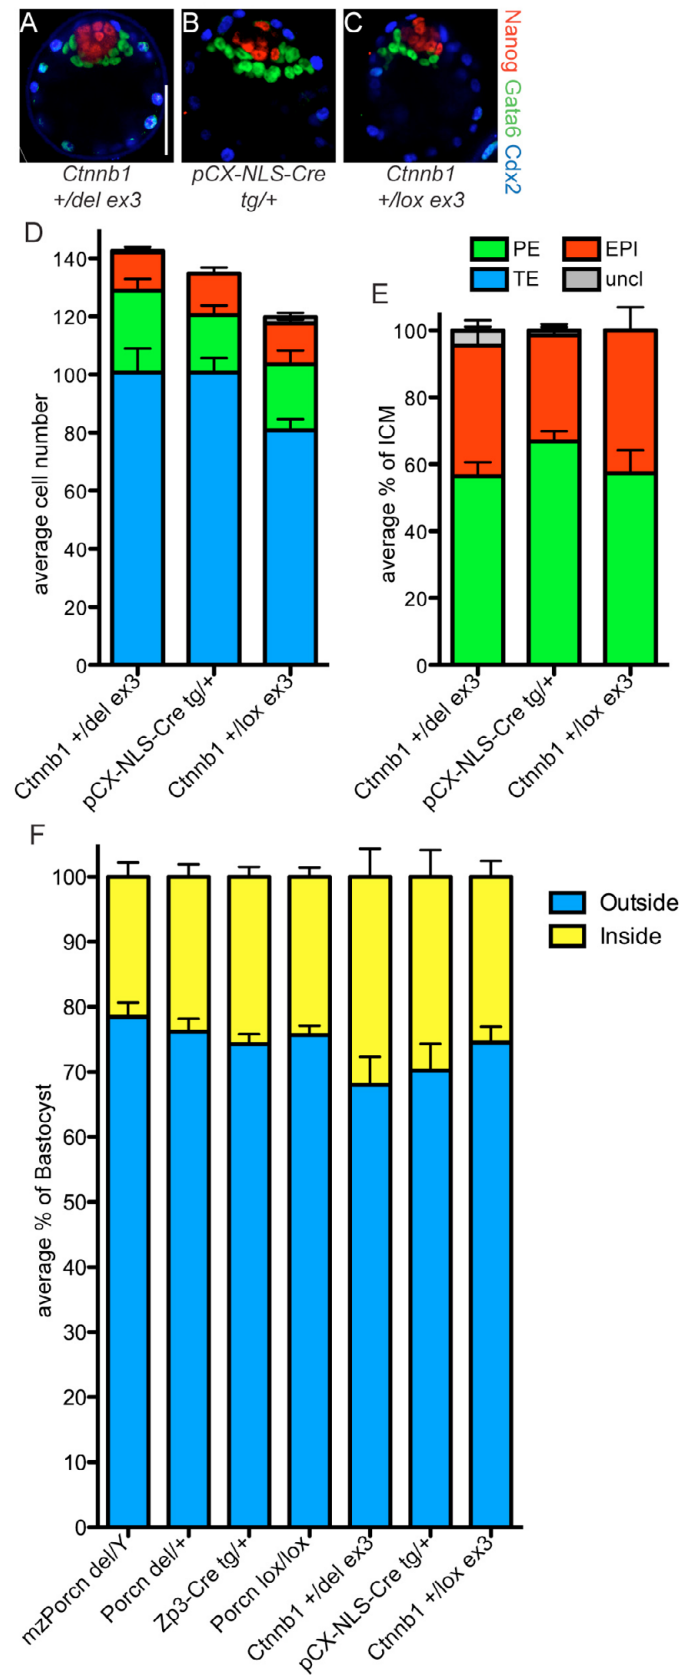

**Fig. S5. Preimplantation development is unperturbed in embryos with ectopic canonical Wnt signaling.** (A-C) Representative confocal sections of E4.5 blastocysts immunostained for Nanog, Gata6 and Cdx2. (D) Differences approaching significance can be observed in the quantification of cell fates between embryos carrying an allele encoding stabilized  $\beta$ -catenin (*Ctnnb1* <sup>+/-del ex3</sup>) and control embryos (chi-square test,  $P=0.05118$ ). Graph displays average cell number/embryo for each cell fate ( $n=5$  embryos/genotype). (E) Normalized cell fate distributions within the inner cell mass (ICM). (F) Normalized distribution of inner cells (ICM, yellow) and outer cells (TE, blue) of all genotypes assessed at E4.5. Error bars indicate s.e.m. TE, trophectoderm; PE, primitive endoderm; EPI, epiblast; uncl, unclassified cells.

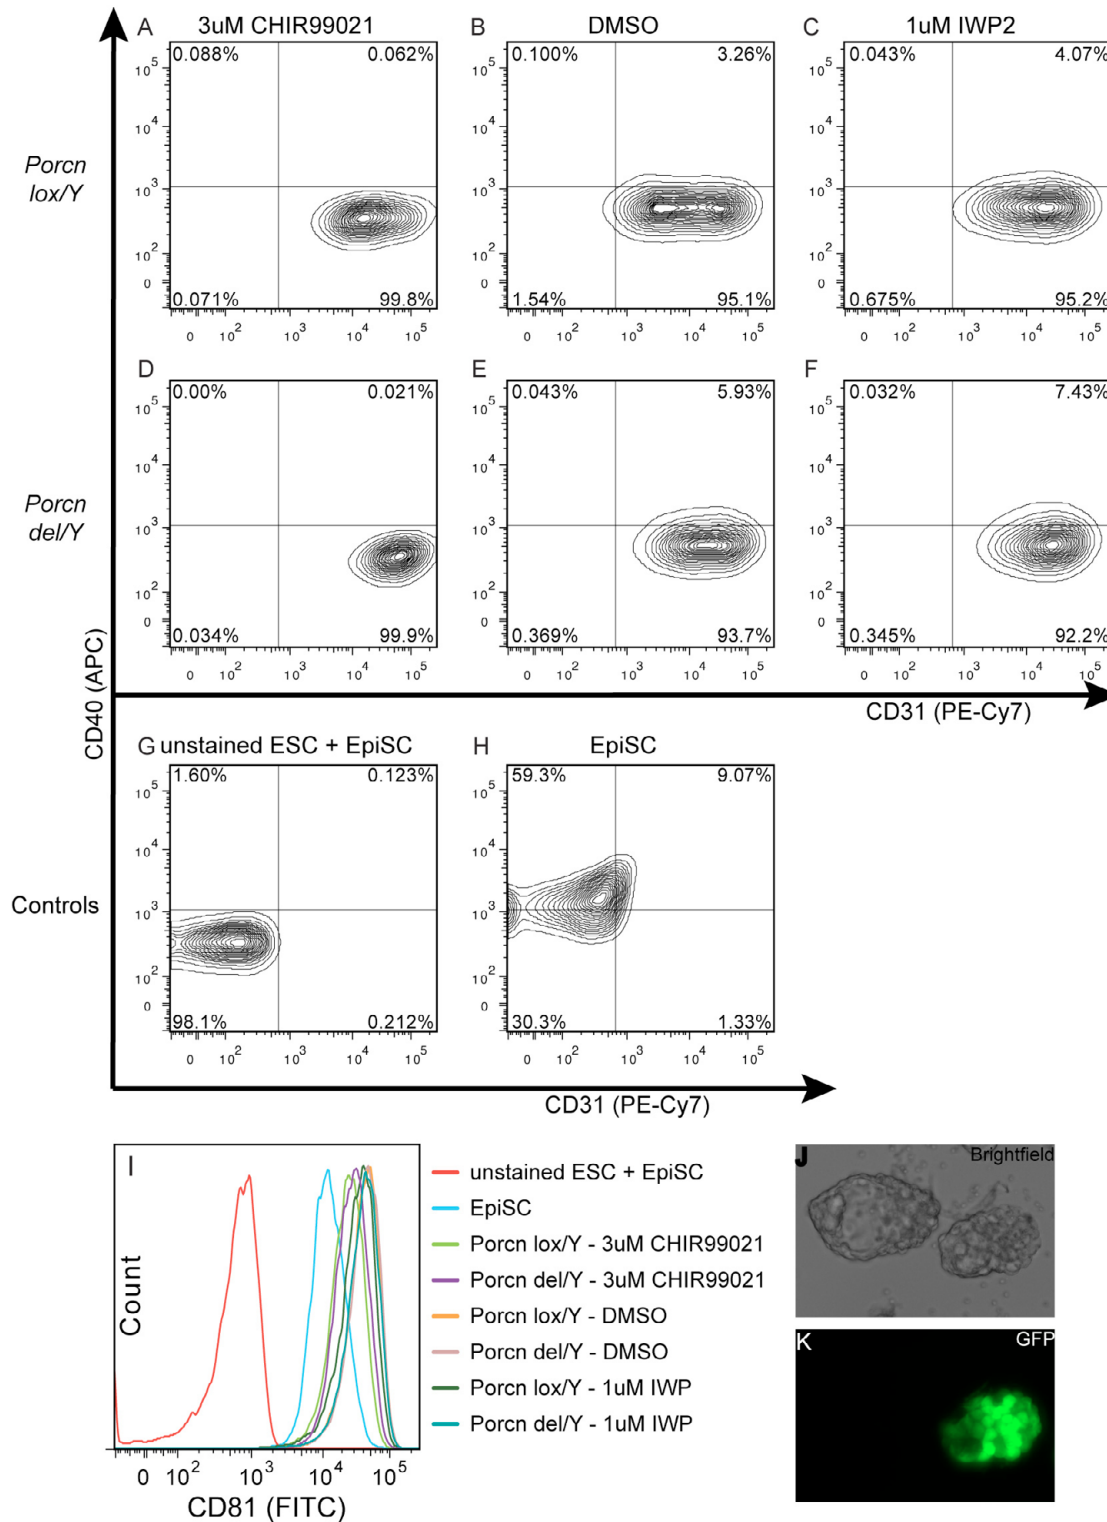

**Fig. S6. *Porcn* is not required for the maintenance of pluripotency of ESCs *in vitro* or for embryonic diapause *in vivo*.** (A-H) Flow cytometry plots of ESCs displaying expression of the ESC marker CD31 and the EpiSC marker CD40. *Porcn* wild-type (lox/Y, A-C) and mutant (del/Y, D-F) ESCs after three passages in the absence of serum and feeder cells, and in the presence of Mek inhibitor and LIF. Wnt signaling levels were manipulated by Gsk3 inhibition (CHIR99021, A,D) or *Porcn* inhibition (IWP2, C,F). DMSO treatment (B,E) served as a control. Cells in all conditions (A-F) maintained high expression of CD31 and low levels of CD40, and thus displayed a distinct profile compared with EpiSCs (H). (G) Unstained mixture of ESCs and EpiSCs as a negative control. (I) Histograms of CD81 obtained by flow cytometric analysis of *Porcn* wild-type (lox/Y) and mutant (del/Y) ESCs cultured as in A-F. Consistent with CD31 expression (A-F), CD81 expression levels remained high in all conditions tested when compared with EpiSCs and unstained cells. (J,K) Representative diapause embryos at EDG10. Brightfield (J) and GFP fluorescence (K) image of diapause blastocysts recovered from *Porcn*<sup>lox/lox</sup>, *Zp3-Cre*<sup>+/-</sup> females crossed to *XEGFP*<sup>tg/Y</sup> males. The GFP<sup>+</sup> embryo is heterozygous for *Porcn*, whereas the GFP<sup>-</sup> embryo is a maternal and zygotic *Porcn* mutant (*Porcn*<sup>del/Y</sup>). When transferred into surrogates, 90% of *Porcn*<sup>del/Y</sup> embryos implanted and developed to gastrulation stages (*n*=10).

**Table S1. Antibodies used for imaging of preimplantation embryos**

| <b>Antibody/stain</b>             | <b>Source, catalog number</b> | <b>Dilution</b> |
|-----------------------------------|-------------------------------|-----------------|
| <b>Primary antibody</b>           |                               |                 |
| Rabbit anti-Nanog                 | Cosmo Bio, REC-RCAB0002       | 1:200           |
| Goat anti-Gata6                   | R&D Systems, AF1700           | 1:200           |
| Mouse anti-Cdx2                   | BioGenex, MU392-UC            | 1:200           |
| <b>Secondary antibody</b>         |                               |                 |
| Donkey anti-rabbit Dylight 549    | Jackson ImmunoResearch        | 1:400           |
| Donkey anti-goat Alexa Fluor 488  | Molecular Probes              | 1:400           |
| Donkey anti-mouse Alexa Fluor 633 | Molecular Probes              | 1:400           |
| <b>Nucleus visualization</b>      |                               |                 |
| Hoechst 33342                     | Molecular Probes              |                 |

**Table S2. TaqMan gene expression assays used for single-cell gene expression analysis**

| Probe                      | Function                  | Lineage            |
|----------------------------|---------------------------|--------------------|
| <i>Actb</i>                | Housekeeping gene         | n/a                |
| <i>Axin2</i>               | Wnt target                | n/a                |
| brachyury ( <i>T</i> )     | Wnt target/lineage marker | Meso/endoderm      |
| <i>c-Myc</i>               | Wnt target                | n/a                |
| cyclin D1 ( <i>Ccnd1</i> ) | Wnt target                | n.a                |
| <i>Ctnnb1</i>              | Wnt component             | n/a                |
| <i>Cripto</i>              | Lineage marker            | Epiblast           |
| <i>Ddx3y</i>               | Sexing/genotyping         | Male specific      |
| <i>Dnmt3b</i>              | Lineage marker            | Epiblast           |
| <i>Eomes</i>               | Lineage marker            | Trophectoderm      |
| <i>Fgf4</i>                | Lineage marker            | Epiblast           |
| <i>Fgf5</i>                | Lineage marker            | Epiblast           |
| <i>Fgfr2</i>               | Lineage marker            | Trophectoderm      |
| <i>Gapdh</i>               | Housekeeping gene         | n/a                |
| <i>Gata3</i>               | Lineage marker            | Trophectoderm      |
| <i>Gata4</i>               | Lineage marker            | Primitive endoderm |
| <i>Gata6</i>               | Lineage marker            | Primitive endoderm |
| <i>Gbx2</i>                | Wnt target/lineage marker | n/a, neural        |
| <i>Klf2</i>                | Lineage marker            | Epiblast           |
| <i>Klf4</i>                | Lineage marker            | Epiblast           |
| <i>Lef1</i>                | Wnt target                | n/a                |
| <i>Nanog</i>               | Lineage marker            | Epiblast           |
| <i>Oct3/4</i>              | Lineage marker            | Epiblast           |
| <i>Otx2</i>                | Lineage marker            | Epiblast/neural    |
| <i>Pdgfra</i>              | Lineage marker            | Primitive endoderm |
| <i>Pecam1</i>              | Lineage marker            | Epiblast           |
| <i>Porcn</i>               | Wnt component             | n/a                |
| <i>Rex1</i>                | Lineage marker            | Epiblast           |
| <i>Sox2</i>                | Lineage marker            | Epiblast           |
| <i>Sox7</i>                | Lineage marker            | Primitive endoderm |
| <i>Sox17</i>               | Lineage marker            | Primitive endoderm |
| <i>Stella</i>              | Lineage marker            | Epiblast           |
| <i>Tcf1</i>                | Wnt target                | n/a                |
| <i>Uty</i>                 | Sexing/Genotyping         | Male specific      |
| <i>Wls</i>                 | Wnt target                | n/a                |
| <i>Xist</i>                | Sexing/genotyping         | Female specific    |

**Table S3. Antibodies used for FACS analysis**

| Antibody                     | Source, catalog number              | Dilution |
|------------------------------|-------------------------------------|----------|
| <b>Primary</b>               |                                     |          |
| Rat anti-CD31–PECy7          | Biolegend, 102418                   | 1:200    |
| Rat anti-CD81–FITC           | R&D Systems, FAB4865F               | 1:20     |
| Goat anti-CD40               | R&D Systems, AF440                  | 1:50     |
| <b>Secondary</b>             |                                     |          |
| Donkey anti-goat DyLight 649 | Jackson ImmunoResearch, 705-495-147 | 1:800    |

**Table S4. Raw data from Fluidigm analysis**

[Download Table S4](#)
